# Supplementary material for: Older adult supportive environment at home—a case study in Jordan: overall sense of control associated with home modification
Source: Frontiers journal article supplement (doi:10.3389/fpubh.2024.1329315), 2024-12-04
Supplement: Supplementary_file_1.docx [file Supplementary_file_1.docx]

Supplementary Material 1

## Supplementary Figures

**Figure 1:** Predicted linear probability plot for the overall sense of control with socio-economic characteristics
